# Supplementary material for: Evaluating CRISPR-based prime editing for cancer modeling and CFTR repair in organoids
Source: Life Sci Alliance. 2021 Aug 9;4(10):e202000940. doi: 10.26508/lsa.202000940 (PMC8356249; doi:10.26508/lsa.202000940)
Supplement: Supplementary file 1 [file LSA-2020-00940_TableS1.xlsx]

## Sheet: Sheet1
Guide type	Name	spacer	3'-extension
pegRNA	TP53-R175H	AGCACATGACGGAGGTTGTG	GTGGGGGCAGtGtctCACAACCTCCGTCATGT
pegRNA	TP53-C242Afs*5	CCGGTTCATGCCGCCCATGC	GTAACAGTTCTGCATGGGCGGCATGAAC
pegRNA	TP53-R248Q	CCTGCATGGGCGGCATGAAC	GATGGGCCTCtGGTTCATGCCGCCCATGC
pegRNA	TP53-R249S	GCATGGGCGGCATGAACCGG	TGAGGATGGGaCTCCGGTTCATGCCGCCCA
pegRNA	TP53-E298*	CCTCGCTTAGTGCTCCCTGG	GCCTCACCACtAGCTgctCCCAGGGAGCACTAAGCG
pegRNA	TP53-E294*	AGAGAATCTCCGCAAGAAAG	TGGTGAGGCTaCCCTTTCTTGCGGAGATTC
pegRNA	TP53-C176*	CTGAGCAGCGCTCATGGTGG	GTGAGGCGCtttCCCCACCATGAGCGCTGCT
pegRNA	APC-R1450*	ATTTTTAGGTACTTCTCGCT	AAACCAAGtGAGAAGTACCTAA
pegRNA	TP53-Y220C	CAGACCTCAGGCGGCTCATA	GGTGGTGCCCTGTGAGCCGCCTGAG
pegRNA	APC-T1556Nfs*3	CATCATCTGAATCATCTAAT	GCAGAAAAAACcTATTGATTCTGAAAAGGacaTATTAGATGATTCAGATG
pegRNA	CFTR-F508del_1_PBS13	ACCATTAAAGAAAATATCAT	GAAACACCAAAGATGATATTTTCTTTAA
pegRNA	CFTR-F508del_1_PBS18	ACCATTAAAGAAAATATCAT	GAAACACCAAAGATGATATTTTCTTTAATGGTG
pegRNA	CFTR-F508del_2_PBS13	CAGTTTTCCTGGATTATGCC	AAACACCAAAGATGATATTTTCTTTAATGGTGCCAGGCATAATCCAGG
pegRNA	CFTR-F508del_2_PBS18	CAGTTTTCCTGGATTATGCC	AAACACCAAAGATGATATTTTCTTTAATGGTGCCAGGCATAATCCAGGAAAAC
pegRNA	CFTR-R785*_1_PBS13	ATGACACACTCAGTTAACCA	GTCTTTCGGTGAATGTTCTGACCTTGGTTAACTGAGTGTG
pegRNA	CFTR-R785*_1_PBS18	ATGACACACTCAGTTAACCA	GTCTTTCGGTGAATGTTCTGACCTTGGTTAACTGAGTGTGTCATC
pegRNA	CFTR-R785*_2_PBS13	GGCCAGTGACACTTTTCGTG	ACATTCACCGAAAGACAACAGCATCCACACGAAAAGTGTCACT
pegRNA	CFTR-R785*_2_PBS18	GGCCAGTGACACTTTTCGTG	ACATTCACCGAAAGACAACAGCATCCACACGAAAAGTGTCACTGGCCC
PE3-guide	TP53-R175H-PE3	GCGGGTGCCGGGCGGGGGTG
PE3-guide	TP53-C242Afs*5-PE3	ACATGTGTAACAGTTCTGCA
PE3-guide	TP53-R248Q-PE3	CtGGTTCATGCCGCCCATGC
PE3-guide	TP53-R249S-PE3	TGATGGTGAGGATGGGaCTC
PE3-guide	TP53-E298*-PE3	CCTCACCACtAGCTgctCCC
PE3-guide	TP53-E294*-PE3	GGTGAGGCTaCCCTTTCTTG
PE3-guide	TP53-C176*-PE3	GCTGGTTGCCCAGGGTCCCC
PE3-guide	TP53-Y220C	AGTGGAAGGAAATTTGCGTG
PE3-guide	APC-R1450*-PE3	ACTGCTGAAAAGAGAGAGAG
PE3-guide	APC-T1556Nfs*3-PE3	CCAGTTCAGGAAAATGACAA
PE3-guide	CFTR-F508del-PE3_1	TCTGTATCTATATTCATCAT
PE3-guide	CFTR-F508del-PE3_2	AGTTTCTTACCTCTTCTAGT
PE3-guide	CFTR-R785*-PE3_1	GTTCAGTCAAGTTTGCCTGA
PE3-guide	CFTR-R785*-PE3_2	ATGACACACTCAGTTAACCA
PE3-guide	CFTR-R785*-PE3_3	CTGAGTGTGTCATCAGGTTC
PE3-guide	CFTR-R785*-PE3_4	CCACGCTTCAGGCACGAAGG
HDR-guide	CFTR-F508del_HDR	ACCATTAAAGAAAATATCAT
HDR-guide	CFTR-R785*_HDR	TTCaGTGAATGTTCTGACCT
ABE-guide	TP53-Y220C	CCTATGGGCCGCCTGAGGTC
ABE-guide	CFTR-R785*_ABE	TTCaGTGAATGTTCTGACCT
CFTR-R785* HDR repair ssDNA template	ATCAGCGTGATCAGCACTGGCCCCACGCTTCAGGCACGAAGGAGGCAGTCTGTCCTGAACCTGATGACACACTCAGTTAAtCAgGGcCAaAACATTCACCGAAAGACAACAGCATCCACACGAAAAGTGTCACTGGCCCCTCAGGCAAACTTGACTGAACTGGATATATATTCAAGAAGGTT
