# Supplementary material for: Evaluating CRISPR-based prime editing for cancer modeling and CFTR repair in organoids
Source: Life Sci Alliance. 2021 Aug 9;4(10):e202000940. doi: 10.26508/lsa.202000940 (PMC8356249; doi:10.26508/lsa.202000940)
Supplement: Supplementary file 2 [file LSA-2020-00940_TableS2.xlsx]

## Sheet: Sheet1
Target	fw PCR primer	reverse PCR primer	primer for sequencing
TP53-R175H	CTGAGGTGTAGACGCCAACT	GACAACCACCCTTAACCCCTC	CAGTACTCCCCTGCCCTCAAC
TP53-C176F	CTGAGGTGTAGACGCCAACT	GACAACCACCCTTAACCCCTC	CAGTACTCCCCTGCCCTCAAC
TP53-R249S	TGGGACCTCTTAACCTGTGGCTT	TTCTTCTTTGGCTGGGGAGAGG	CCAGAAAGGACAAGGGTGGTTG
CFTR-F508del	TGGAGGCAAGTGAATCCTGAGCGT	TCTGCTGGCAGATCAATGCTCA	TGGAGGCAAGTGAATCCTGAGCGT
CFTR-R785*	CGAAGAGGATTCTGATGAGC	TACTGCACCTCTTCCCACAG	TACTGCACCTCTTCCCACAG
